# Supplementary material for: A quantitative analysis of the impact of wind turbines on operational Doppler weather radar data
Source: Copernicus journal article supplement (doi:10.5194/amt-8-593-2015), 2015-02-05
Supplement: Supplementary file 1 [file amt-8-593-2015-supplement.zip]

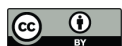

## *Supplement of*

# **A quantitative analysis of the impact of wind turbines on operational Doppler weather radar data**

**L. Norin**

*Correspondence to:* L. Norin (lars.norin@smhi.se)

- [amt-8-593-2015-supplement-cover-letter.pdf](#)
- [figS01.mp4](#)
- [figS02.mp4](#)
- [figS03.mp4](#)
